# Supplementary material for: Intra and Inter-Spore Variability in Rhizophagus irregularis AOX Gene
Source: PubMed Central journal article supplement (PMC4634980; doi:10.1371/journal.pone.0142339), 2015-11-05
Supplement: pone.0142339.s004.pdf [file pone.0142339.s004.pdf]

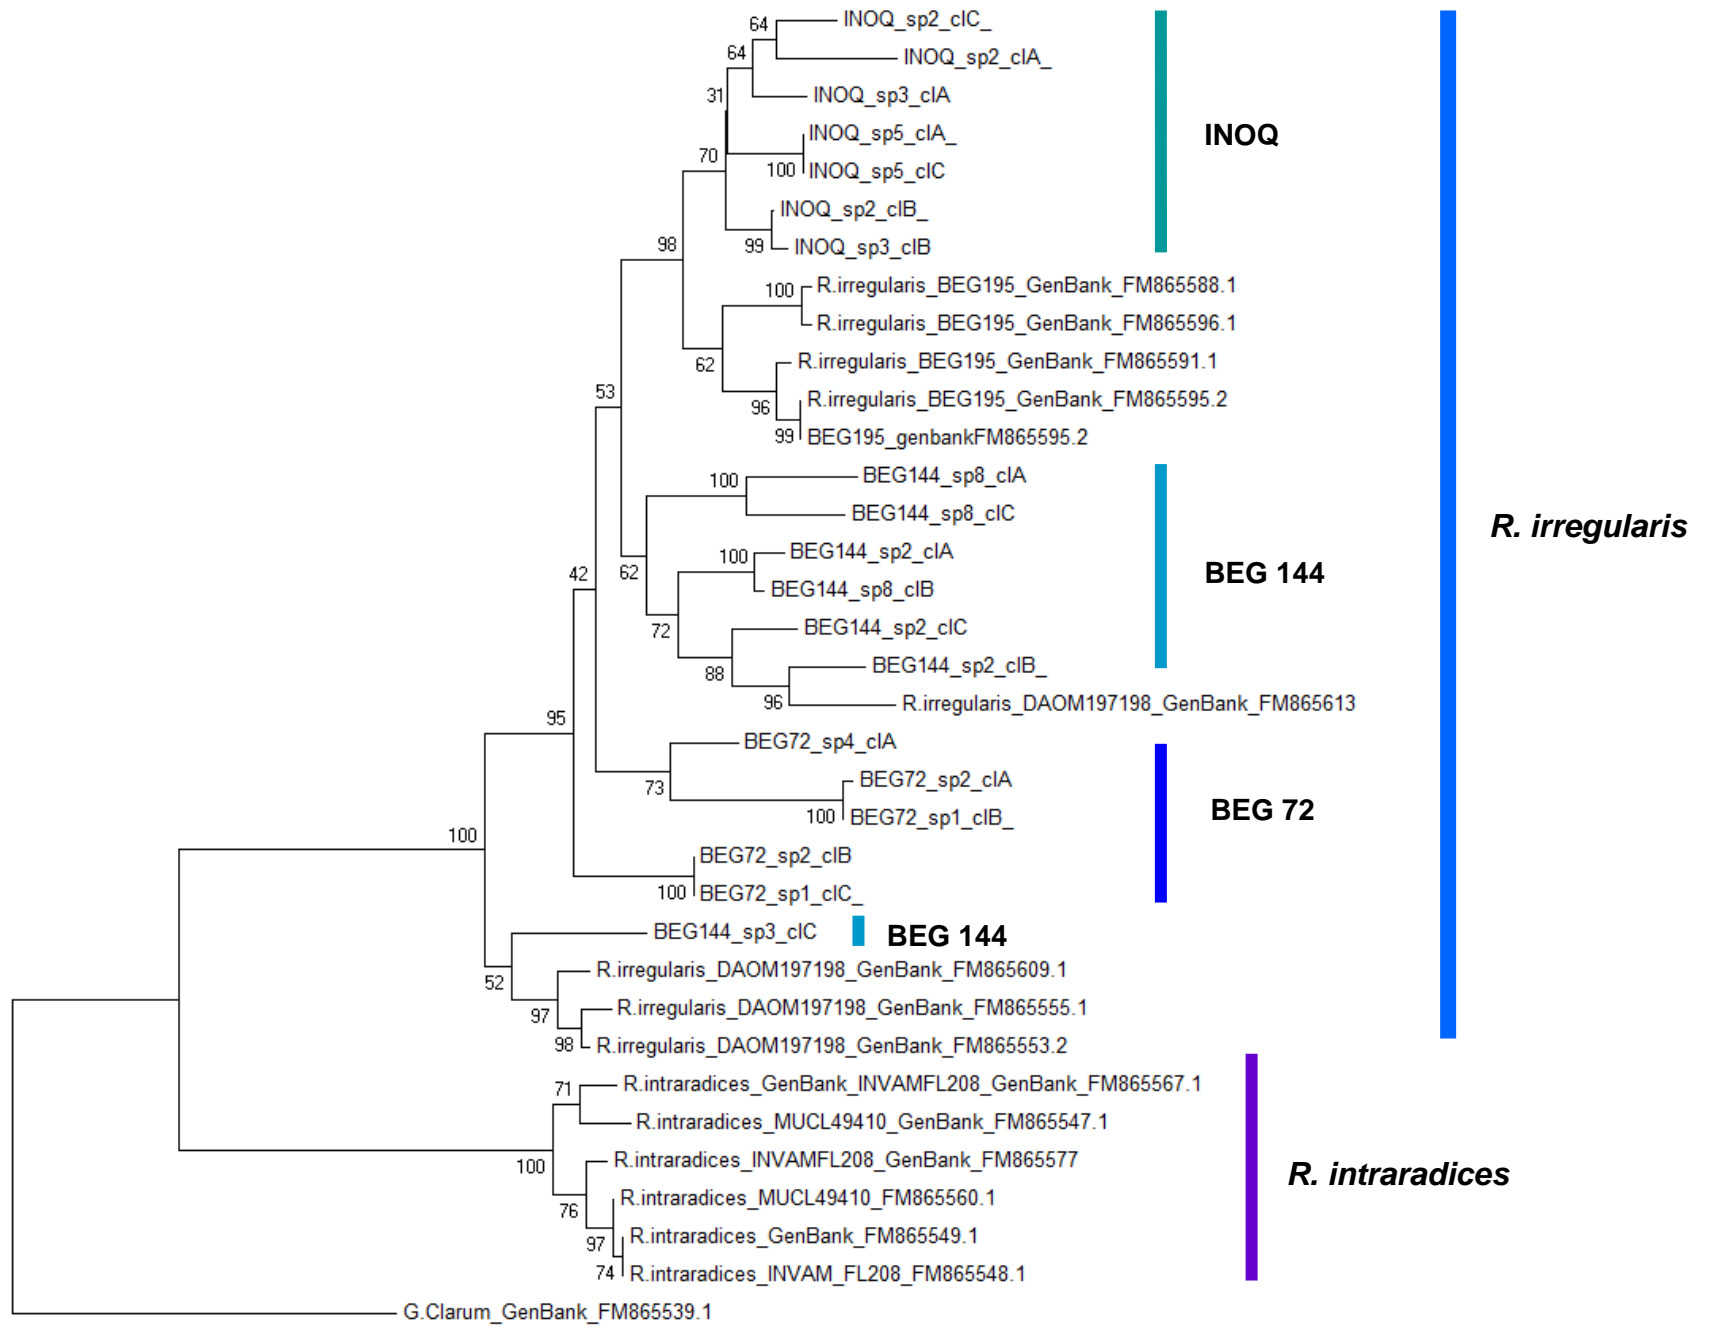

0.01
