# Supplementary material for: Intra and Inter-Spore Variability in Rhizophagus irregularis AOX Gene
Source: PubMed Central journal article supplement (PMC4634980; doi:10.1371/journal.pone.0142339), 2015-11-05
Supplement: pone.0142339.s007.pdf [file pone.0142339.s007.pdf]

1 **FUNGI**

- 2 >Galerina marginata\_AOX\_A0A067TS33
- 3 >Absidia idahoensis\_AOX\_A0A077X462
- 4 >Rhizopus delemar\_AOX\_1CQV1
- 5 >Ceriporiopsis subvermispora\_AOX\_M2QSD3
- 6 >Laccaria bicolor\_B0CVV3
- 7 >Agaricus bisporus\_K5X8R3
- 8 >Cryptococcus gattii\_E6R040
- 9 >Talaromyces stipitatus\_B8LT09
- 10 >Coccidioides posadasii\_C5PHD7
- 11 >Macrophomina phaseolina\_K2S5D4
- 12 >Gelasinospora\_sp\_Q8J1Z2
- 13 >Neurospora crassa\_Q7S371
- 14 >Candida albicans\_AOX1\_AAC98914.1
- 15 >Candida albicans\_AOX2\_AAF21993.1
- 16 >Trachipleistophora hominis\_D5JAJ1
- 17 >Nematocida parisii\_I3EP00
- 18 >Spraguea lophii\_S7WC03
- 19 >Batrachochytrium dendrobatidis\_F4P6T0
- 20 >Lichtheimia corymbifera\_CDH55114
- 21 >Mucor circinelloides\_S2JKA7
- 22 >Rozella allomycis\_CSF55

23

24 **PLANTS**

- 25 >Arabidopsis lyrata\_AOX1a\_AL3G24690
- 26 >Arabidopsis lyrata\_AOX1c\_AL5G06730
- 27 >Arabidopsis thaliana\_AOX1d\_AT1G32350
- 28 >Arabidopsis thaliana\_AOX1a\_AT3G22370
- 29 >Arabidopsis thaliana\_AOX1b\_AT3G22360

30 >Arabidopsis\_thaliana\_AOX1c\_AT3G27620  
31 >Arabidopsis\_thaliana\_AOX2\_AT5G64210  
32 >Brachypodium\_distachyon\_AOX1b\_BD3G52505  
33 >Brachypodium\_distachyon\_AOX1d\_BD5G20547  
34 >Brassica\_rapa\_AOX1a\_BR05G21590  
35 >Brassica\_rapa\_AOX1b\_BR01G28900  
36 >Brassica\_rapa\_AOX1d\_Bra010153  
37 >Brassica\_rapa\_AOX2\_BR09G06750  
38 >Carica\_papaya\_AOX2\_CP00042G00490  
39 >Cucumis\_sativus\_AOX2\_Q7Y1B3  
40 >Daucus\_carota\_AOX1\_AID15803.1  
41 >Daucus\_carota\_AOX2a\_ADB24724.1  
42 >Fragaria\_vesca\_AOX2\_FV5G21950  
43 >Fragaria\_vesca\_AOX1a\_FV5G29310  
44 >Glycine\_max\_AOX1a\_GM04G14800  
45 >Glycine\_max\_AOX2d\_GM08G07690  
46 >Glycine\_max\_AOX2\_GM08G07700  
47 >Hordeum\_vulgare\_AOX1b\_sG9CJ23  
48 >Lotus\_japonicus\_AOX1a\_LJ2G020780  
49 >Lotus\_japonicus\_AOX2\_LJ4G005280  
50 >Lotus\_japonicus\_AOX2d\_LJ4G005290  
51 >Malus\_domestica\_AOX2\_MD13G026910  
52 >Malus\_domestica\_AOX2\_MD00G081720  
53 >Manihot\_esculenta\_AOX2\_ME10292G00060  
54 >Medicago\_truncatula\_AOX1a\_MT5G026620  
55 >Medicago\_truncatula\_AOX2d\_MT5G070870  
56 >Musa\_acuminata\_AOX1\_MA06G01170  
57 >Nicotiana\_tabacum\_AOX1\_Q41224  
58 >Oryza\_brachyantha\_AOX1b\_OB04G30980

59 >Oryza\_brachyantha\_AOX1c\_OB02G22630  
60 >Oryza\_brachyantha\_AOX1d\_OB04G30990  
61 >Oryza\_glaberrima\_AOX1b\_ORGLA04G0206000  
62 >Oryza\_glaberrima\_AOX1d\_ORGLA04G0206100  
63 >Oryza\_sativa\_AOX1\_BGIOGA008063  
64 >Oryza\_sativa\_AOX1\_BGIOGA014422  
65 >Oryza\_sativa\_AOX1d\_BGIOGA014421  
66 >Picea\_sitchensis\_AOX1\_A9NRS5  
67 >Populus\_trichocarpa\_AOX1d\_PT03G10390  
68 >Populus\_trichocarpa\_AOX1a\_PT12G00160  
69 >Physcomitrella\_patens\_AOX\_PP00183G00030  
70 >Ricinus\_communis\_AOX2\_RC30063G00030  
71 >Selaginella\_moellendorffii\_AOX\_SM00020G03270  
72 >Solanum\_lycopersicum\_AOX1\_SL08G005550.1  
73 >Solanum\_lycopersicum\_AOX1d\_SL08G075550.1  
74 >Solanum\_lycopersicum\_AOX2\_Solyc01g105220.2  
75 >Solanum\_tuberosum\_AOX2\_ST01G042270  
76 >Sorghum\_bicolor\_AOX1d1\_SB06G027420  
77 >Sorghum\_bicolor\_AOX1d2\_SB06G027430  
78 >Sorghum\_bicolor\_AOX1\_SB04G030820  
79 >Sorghum\_bicolor\_AOX1\_SB06G027410  
80 >Theobroma\_cacao\_AOX2\_TC02G011670  
81 >Theobroma\_cacao\_AOX1c\_TC03G031300  
82 >Vitis\_vinifera\_AOX2\_VV00G00110  
83 >Vigna\_unguiculata\_AOX1a\_Q4F8G4  
84 >Vigna\_unguiculata\_AOX2a\_A2IBG3  
85 >Vitis\_vinifera\_AOX1a\_VV02G09050  
86 >Vitis\_vinifera\_AOX1d\_VV02G09030  
87 >Zea\_mays\_AOX1\_ZM02G05500

88 >Zea\_mays\_AOX1d1\_ZM02G05490

89 >Zea\_mays\_AOX1d2\_ZM02G05480

90

91 BACTERIA

92 >Rhodanobacter\_sp.\_AOX\_I4WCT1

93 >Afipia\_felis\_AOX\_A0A090MMY7
