# Supplementary material for: Intra and Inter-Spore Variability in Rhizophagus irregularis AOX Gene
Source: PubMed Central journal article supplement (PMC4634980; doi:10.1371/journal.pone.0142339), 2015-11-05
Supplement: pone.0142339.s008.pdf [file pone.0142339.s008.pdf]

| <b>Gene name</b> | <b>GenBank accession #</b> | <b>Primer sequence (5'-3')</b>                                                   | <b>Size (bp)</b> |
|------------------|----------------------------|----------------------------------------------------------------------------------|------------------|
| <i>SIEF-1</i>    | X14449                     | SIEF-1-F: GATTGGTGGTATTGGAAGCTGTC<br>SIEF-1-R: AGCTTCGTGGTGCATCTC                | 133              |
| <i>SIActin2</i>  | EU408340                   | SIActin2-F: TTGCTGACCGTATGAGCAAG<br>SIActin2-R: GGACAATGGATGGACCAGAC             | 186              |
| <i>SIPT4</i>     | AY885651                   | SILePT4-F: GAAGGGGAGCCATTTAATGTGG<br>SILePT4-R: ATCGCGGCTTGTTTAGCATTTTC          | 182              |
| <i>SIAOX1a</i>   | NP_001234117               | SIAOX1aFw_701: TGGAAGTTGCAAAGCCAAATG<br>SIAOX1aRev_757:CGCCTTGCACTGCGAAA         | 57               |
| <i>SIAOX1b</i>   | NP_001234120               | SIAOX1bFw_817: GCCGATGCAACGCTAAAAG<br>SIAOX1bRev_879:TCCCGATGATGTGCCTCAT         | 62               |
| <i>SIAOX1c</i>   | XP_004244430               | SIAOX1cFw_900: TGAGGGAAATATTGAAAACGTAGCT<br>SIAOX1cRev_961: GCGTCAAACGCCAATAATCA | 62               |
| <i>SIAOX2</i>    | XP_004230603               | SIAOX2Fw_366: CATGCCATGGGAGACATATCAG<br>SIAOX2Rev_426: GGGCACATGGTGCTTGCT        | 61               |
| <i>RiAOX</i>     | KT423115                   | RiAOXFw1: AAAATGAACGTATGCACTTGATGAC<br>RiAOXRv1: GCGTTCCCACCAGGTAGGT             | 62               |
| <i>RiTEF1a</i>   | AJ831587.1                 | RiTEF1a_Fw: TGAAAAAGAAGCACAAGAAC<br>RiTEF1a_Rv:CCAACACCCAAGCATA                  | 57               |
| <i>RiBTub1</i>   | AY326320.1                 | RiBTub1_Fw: AAGCGGAATCTTGTGATTGTTTG<br>RiBTub1_Rv: CCCATACCAGCTCCAGTACCA         | 76               |
