# Supplementary material for: Intra and Inter-Spore Variability in Rhizophagus irregularis AOX Gene
Source: PubMed Central journal article supplement (PMC4634980; doi:10.1371/journal.pone.0142339), 2015-11-05
Supplement: pone.0142339.s009.pdf [file pone.0142339.s009.pdf]

|                     | <b>Weeks post inoculation</b> |                         |                         |                         |
|---------------------|-------------------------------|-------------------------|-------------------------|-------------------------|
|                     | <b>1</b>                      | <b>2</b>                | <b>4</b>                | <b>6</b>                |
| <b><i>F</i> (%)</b> | 8.3 ± 4.8 <sup>a</sup>        | 18.9 ± 5.9 <sup>a</sup> | 48.3 ± 2.4 <sup>b</sup> | 51.1 ± 7.8 <sup>b</sup> |
| <b><i>M</i> (%)</b> | 0.2 ± 0.1 <sup>a</sup>        | 0.3 ± 0.1 <sup>a</sup>  | 9.4 ± 3.8 <sup>b</sup>  | 18.4 ± 5.8 <sup>c</sup> |
| <b><i>m</i> (%)</b> | 0.9 ± 0.4 <sup>a</sup>        | 1.6 ± 0.4 <sup>b</sup>  | 19.1 ± 7.4 <sup>c</sup> | 34.4 ± 5.3 <sup>c</sup> |
| <b><i>V</i> (%)</b> | 0.0 ± 0.0 <sup>a</sup>        | 0.0 ± 0.0 <sup>a</sup>  | 0.5 ± 0.4 <sup>b</sup>  | 1.2 ± 0.6 <sup>c</sup>  |
| <b><i>A</i> (%)</b> | 0.0 ± 0.0 <sup>a</sup>        | 0.0 ± 0.0 <sup>a</sup>  | 0.8 ± 0.4 <sup>b</sup>  | 1.7 ± 0.6 <sup>c</sup>  |
