# Supplementary material for: Intra and Inter-Spore Variability in Rhizophagus irregularis AOX Gene
Source: PubMed Central journal article supplement (PMC4634980; doi:10.1371/journal.pone.0142339), 2015-11-05
Supplement: pone.0142339.s010.pdf [file pone.0142339.s010.pdf]

|               | Region     | Type       | Reference | Allele   | Count        | Coverage     | Frequency       | Homopolymer | Amino acid change      | Non-synonymous |
|---------------|------------|------------|-----------|----------|--------------|--------------|-----------------|-------------|------------------------|----------------|
| INOQ 2        | 46         | SNV        | G         | A        | 2685         | 2688         | 99,88839        | No          | CDS:p.Val16Ile         | Yes            |
| INOQ 2        | 80         | SNV        | T         | C        | 31           | 2661         | 1,164976        | No          | CDS:p.Leu27Ser         | Yes            |
| INOQ 2        | 85..86     | MNV        | CA        | AC       | 116          | 5371         | 2,159747        | No          | CDS:p.Gln29Thr         | Yes            |
| INOQ 2        | 220        | SNV        | C         | T        | 62           | 5717         | 1,084485        | No          | CDS:p.Pro74Ser         | Yes            |
| INOQ 2        | 255        | SNV        | A         | T        | 52           | 4638         | 1,121173        | No          | CDS:p.Lys85Asn         | Yes            |
| INOQ 2        | 296        | SNV        | G         | A        | 7257         | 7533         | 96,33612        | No          | CDS:p.Ser99Asn         | Yes            |
| <b>INOQ 2</b> | <b>731</b> | <b>SNV</b> | <b>A</b>  | <b>C</b> | <b>7559</b>  | <b>7575</b>  | <b>99,78878</b> | <b>No</b>   | <b>CDS:p.Asn194Thr</b> | <b>Yes</b>     |
| INOQ 2        | 1202       | SNV        | G         | A        | 2            | 68           | 2,941176        | No          | CDS:p.Ala329Thr        | Yes            |
| INOQ 3        | 46         | SNV        | G         | A        | 176          | 176          | 100             | No          | CDS:p.Val16Ile         | Yes            |
| INOQ 3        | 220        | SNV        | C         | T        | 3            | 289          | 1,038062        | No          | CDS:p.Pro74Ser         | Yes            |
| INOQ 3        | 296        | SNV        | G         | A        | 260          | 283          | 91,87279        | No          | CDS:p.Ser99Asn         | Yes            |
| <b>INOQ 3</b> | <b>731</b> | <b>SNV</b> | <b>A</b>  | <b>C</b> | <b>371</b>   | <b>425</b>   | <b>87,29412</b> | <b>No</b>   | <b>CDS:p.Asn194Thr</b> | <b>Yes</b>     |
| INOQ 3        | 1116       | SNV        | T         | G        | 3            | 200          | 1,5             | No          | CDS:p.Val300Gly        | Yes            |
| INOQ5         | 46         | SNV        | G         | A        | 4042         | 4094         | 98,72985        | No          | CDS:p.Val16Ile         | Yes            |
| INOQ5         | 61         | SNV        | C         | T        | 50           | 4338         | 1,152605        | No          | CDS:p.His21Tyr         | Yes            |
| INOQ5         | 85..86     | MNV        | CA        | AC       | 149          | 7932         | 1,878467        | No          | CDS:p.Gln29Thr         | Yes            |
| INOQ5         | 112        | SNV        | G         | A        | 107          | 9951         | 1,075269        | No          | CDS:p.Ala38Thr         | Yes            |
| INOQ5         | 130        | SNV        | T         | C        | 110          | 10384        | 1,059322        | No          | CDS:p.Ser44Pro         | Yes            |
| INOQ5         | 296        | SNV        | G         | A        | 11370        | 12016        | 94,62383        | No          | CDS:p.Ser99Asn         | Yes            |
| INOQ5         | <b>731</b> | <b>SNV</b> | <b>A</b>  | <b>C</b> | <b>12717</b> | <b>12892</b> | <b>98,64257</b> | <b>No</b>   | <b>CDS:p.Asn194Thr</b> | <b>Yes</b>     |
| INOQ5         | <b>817</b> | <b>SNV</b> | <b>G</b>  | <b>A</b> | <b>488</b>   | <b>15363</b> | <b>3,176463</b> | <b>No</b>   | <b>CDS:p.Ala223Thr</b> | <b>Yes</b>     |
| INOQ5         | 1116..1117 | MNV        | TG        | GT       | 83           | 7279         | 1,140267        | No          | CDS:p.Val300Gly        | Yes            |
| INOQ5         | 1119       | SNV        | G         | T        | 41           | 3777         | 1,085518        | No          | CDS:p.Gly301Val        | Yes            |
|               | Region     | Type       | Reference | Allele   | Count        | Coverage     | Frequency       | Homopolymer | Amino acid change      | Non-synonymous |
| BEG144_2      | 44         | SNV        | C         | T        | 4            | 291          | 1,37457         | No          | CDS:p.Ala15Val         | Yes            |

|          |            |     |    |    |     |     |          |    |                 |     |
|----------|------------|-----|----|----|-----|-----|----------|----|-----------------|-----|
| BEG144_2 | 61         | SNV | C  | T  | 6   | 284 | 2,112676 | No | CDS:p.His21Tyr  | Yes |
| BEG144_2 | 77         | SNV | T  | A  | 5   | 403 | 1,240695 | No | CDS:p.Ile26Asn  | Yes |
| BEG144_2 | 85..86     | MNV | CA | AC | 11  | 569 | 1,933216 | No | CDS:p.Gln29Thr  | Yes |
| BEG144_2 | 111        | SNV | A  | T  | 12  | 634 | 1,892744 | No | CDS:p.Arg37Ser  | Yes |
| BEG144_2 | 112        | SNV | G  | A  | 7   | 619 | 1,130856 | No | CDS:p.Ala38Thr  | Yes |
| BEG144_2 | 130        | SNV | T  | C  | 8   | 653 | 1,225115 | No | CDS:p.Ser44Pro  | Yes |
| BEG144_2 | 161        | SNV | G  | A  | 549 | 565 | 97,16814 | No | CDS:p.Ser54Asn  | Yes |
| BEG144_2 | 244        | SNV | A  | C  | 531 | 544 | 97,61029 | No | CDS:p.Ile82Leu  | Yes |
| BEG144_2 | 256        | SNV | G  | A  | 441 | 518 | 85,13514 | No | CDS:p.Ala86Thr  | Yes |
| BEG144_2 | 256..257   | MNV | GC | CA | 9   | 518 | 1,737452 | No | CDS:p.Ala86Gln  | Yes |
| BEG144_2 | 356        | SNV | A  | G  | 578 | 588 | 98,29932 | No | CDS:p.Lys119Arg | Yes |
| BEG144_2 | 359        | SNV | C  | T  | 573 | 581 | 98,62306 | No | CDS:p.Thr120Ile | Yes |
| BEG144_2 | 382        | SNV | C  | T  | 478 | 490 | 97,55102 | No | CDS:p.Leu128Phe | Yes |
| BEG144_2 | 718        | SNV | A  | T  | 8   | 417 | 1,918465 | No | CDS:p.Ile190Phe | Yes |
| BEG144_2 | 856        | SNV | G  | C  | 14  | 534 | 2,621723 | No | CDS:p.Val236Leu | Yes |
| BEG144_2 | 859        | SNV | T  | A  | 15  | 514 | 2,918288 | No | CDS:p.Ser237Thr | Yes |
| BEG144_2 | 866        | SNV | A  | G  | 10  | 506 | 1,976285 | No | CDS:p.Asn239Ser | Yes |
| BEG144_2 | 978        | SNV | A  | T  | 230 | 906 | 25,38631 | No | CDS:p.Lys254Ile | Yes |
| BEG144_2 | 1025       | SNV | T  | A  | 961 | 975 | 98,5641  | No | CDS:p.Ser270Thr | Yes |
| BEG144_2 | 1119       | SNV | G  | T  | 6   | 280 | 2,142857 | No | CDS:p.Gly301Val | Yes |
| BEG144_2 | 1160       | SNV | A  | G  | 217 | 238 | 91,17647 | No | CDS:p.Asn315Asp | Yes |
| BEG144_2 | 1163..1164 | MNV | CA | AT | 18  | 265 | 6,792453 | No | CDS:p.His316Ile | Yes |
| BEG144_2 | 1185       | SNV | C  | T  | 2   | 112 | 1,785714 | No | CDS:p.Ala323Val | Yes |

|          |          |     |    |    |      |      |          |    |                 |     |
|----------|----------|-----|----|----|------|------|----------|----|-----------------|-----|
| BEG144_3 | 85..86   | MNV | CA | AC | 120  | 3493 | 3,435442 | No | CDS:p.Gln29Thr  | Yes |
| BEG144_3 | 161      | SNV | G  | A  | 4824 | 4892 | 98,60998 | No | CDS:p.Ser54Asn  | Yes |
| BEG144_3 | 244      | SNV | A  | C  | 6178 | 6228 | 99,19717 | No | CDS:p.Ile82Leu  | Yes |
| BEG144_3 | 256      | SNV | G  | A  | 4901 | 5798 | 84,52915 | No | CDS:p.Ala86Thr  | Yes |
| BEG144_3 | 256..257 | MNV | GC | CA | 98   | 5798 | 1,690238 | No | CDS:p.Ala86Gln  | Yes |
| BEG144_3 | 356      | SNV | A  | G  | 7146 | 7203 | 99,20866 | No | CDS:p.Lys119Arg | Yes |
| BEG144_3 | 359      | SNV | C  | T  | 7047 | 7056 | 99,87245 | No | CDS:p.Thr120Ile | Yes |
| BEG144_3 | 382      | SNV | C  | T  | 6189 | 6243 | 99,13503 | No | CDS:p.Leu128Phe | Yes |

|          |          |     |    |    |      |      |          |    |                 |     |
|----------|----------|-----|----|----|------|------|----------|----|-----------------|-----|
| BEG144_3 | 718..719 | MNV | AT | TA | 152  | 6135 | 2,477588 | No | CDS:p.Ile190Tyr | Yes |
| BEG144_3 | 1025     | SNV | T  | A  | 6262 | 6283 | 99,66576 | No | CDS:p.Ser270Thr | Yes |
| BEG144_3 | 1119     | SNV | G  | T  | 56   | 1428 | 3,921569 | No | CDS:p.Gly301Val | Yes |
| BEG144_3 | 1160     | SNV | A  | G  | 1389 | 1409 | 98,58055 | No | CDS:p.Asn315Asp | Yes |

|          |          |     |    |    |      |      |          |    |                 |     |
|----------|----------|-----|----|----|------|------|----------|----|-----------------|-----|
| BEG144_8 | 85..86   | MNV | CA | AC | 78   | 2728 | 2,859238 | No | CDS:p.Gln29Thr  | Yes |
| BEG144_8 | 161      | SNV | G  | A  | 3493 | 3526 | 99,0641  | No | CDS:p.Ser54Asn  | Yes |
| BEG144_8 | 208      | SNV | T  | A  | 41   | 3390 | 1,20944  | No | CDS:p.Tyr70Asn  | Yes |
| BEG144_8 | 244      | SNV | A  | C  | 4193 | 4201 | 99,80957 | No | CDS:p.Ile82Leu  | Yes |
| BEG144_8 | 256      | SNV | G  | A  | 3336 | 3949 | 84,47708 | No | CDS:p.Ala86Thr  | Yes |
| BEG144_8 | 256..257 | MNV | GC | CA | 60   | 3949 | 1,519372 | No | CDS:p.Ala86Gln  | Yes |
| BEG144_8 | 356      | SNV | A  | G  | 4765 | 4793 | 99,41581 | No | CDS:p.Lys119Arg | Yes |
| BEG144_8 | 359      | SNV | C  | T  | 4716 | 4718 | 99,95761 | No | CDS:p.Thr120Ile | Yes |
| BEG144_8 | 382      | SNV | C  | T  | 4125 | 4162 | 99,111   | No | CDS:p.Leu128Phe | Yes |
| BEG144_8 | 718..719 | MNV | AT | TA | 78   | 3994 | 1,952929 | No | CDS:p.Ile190Tyr | Yes |
| BEG144_8 | 1025     | SNV | T  | A  | 4620 | 4656 | 99,2268  | No | CDS:p.Ser270Thr | Yes |
| BEG144_8 | 1119     | SNV | G  | T  | 30   | 1102 | 2,722323 | No | CDS:p.Gly301Val | Yes |
| BEG144_8 | 1160     | SNV | A  | G  | 930  | 950  | 97,89474 | No | CDS:p.Asn315Asp | Yes |

|         | Region     | Type | Reference | Allele | Count | Coverage | Frequency | Homopolymer | Amino acid change | Non-synonymous |
|---------|------------|------|-----------|--------|-------|----------|-----------|-------------|-------------------|----------------|
| BEG72_1 | 61         | SNV  | C         | T      | 2373  | 2373     | 100       | No          | CDS:p.His21Tyr    | Yes            |
| BEG72_1 | 112        | SNV  | G         | A      | 3670  | 3676     | 99,83678  | No          | CDS:p.Ala38Thr    | Yes            |
| BEG72_1 | 130        | SNV  | T         | C      | 3822  | 3855     | 99,14397  | No          | CDS:p.Ser44Pro    | Yes            |
| BEG72_1 | 718..719   | MNV  | AT        | TA     | 99    | 6051     | 1,636093  | No          | CDS:p.Ile190Tyr   | Yes            |
| BEG72_1 | 866        | SNV  | A         | G      | 7171  | 7466     | 96,04875  | No          | CDS:p.Asn239Ser   | Yes            |
| BEG72_1 | 1119       | SNV  | G         | T      | 22    | 1027     | 2,142162  | No          | CDS:p.Gly301Val   | Yes            |
| BEG72_1 | 1128..1129 | MNV  | AC        | TA     | 28    | 1724     | 1,62413   | No          | CDS:p.Asp304Val   | Yes            |
| BEG72_1 | 1163..1164 | MNV  | CA        | AT     | 821   | 834      | 98,44125  | No          | CDS:p.His316Ile   | Yes            |

|         |     |     |   |   |      |      |          |    |                |     |
|---------|-----|-----|---|---|------|------|----------|----|----------------|-----|
| BEG72_2 | 61  | SNV | C | T | 1117 | 1117 | 100      | No | CDS:p.His21Tyr | Yes |
| BEG72_2 | 112 | SNV | G | A | 1967 | 1976 | 99,54453 | No | CDS:p.Ala38Thr | Yes |

|         |            |     |    |    |      |      |          |    |                 |     |
|---------|------------|-----|----|----|------|------|----------|----|-----------------|-----|
| BEG72_2 | 130        | SNV | T  | C  | 2093 | 2115 | 98,95981 | No | CDS:p.Ser44Pro  | Yes |
| BEG72_2 | 220        | SNV | C  | T  | 32   | 2102 | 1,52236  | No | CDS:p.Pro74Ser  | Yes |
| BEG72_2 | 718        | SNV | A  | T  | 38   | 3617 | 1,050594 | No | CDS:p.Ile190Phe | Yes |
| BEG72_2 | 866        | SNV | A  | G  | 5160 | 5387 | 95,78615 | No | CDS:p.Asn239Ser | Yes |
| BEG72_2 | 1119       | SNV | G  | T  | 8    | 566  | 1,413428 | No | CDS:p.Gly301Val | Yes |
| BEG72_2 | 1163..1164 | MNV | CA | AT | 406  | 411  | 98,78345 | No | CDS:p.His316Ile | Yes |
| BEG72_2 | 1176       | SNV | A  | T  | 3    | 267  | 1,123596 | No | CDS:p.Lys320Met | Yes |
| BEG72_2 | 1178       | SNV | A  | G  | 3    | 196  | 1,530612 | No | CDS:p.Lys321Glu | Yes |

|         |            |     |    |    |      |      |          |    |                 |     |
|---------|------------|-----|----|----|------|------|----------|----|-----------------|-----|
| BEG72_4 | 61         | SNV | C  | T  | 2083 | 2084 | 99,95202 | No | CDS:p.His21Tyr  | Yes |
| BEG72_4 | 112        | SNV | G  | A  | 3091 | 3095 | 99,87076 | No | CDS:p.Ala38Thr  | Yes |
| BEG72_4 | 130        | SNV | T  | C  | 2993 | 3018 | 99,17164 | No | CDS:p.Ser44Pro  | Yes |
| BEG72_4 | 718..719   | MNV | AT | TA | 82   | 4706 | 1,742456 | No | CDS:p.Ile190Tyr | Yes |
| BEG72_4 | 866        | SNV | A  | G  | 5714 | 5960 | 95,87248 | No | CDS:p.Asn239Ser | Yes |
| BEG72_4 | 1116       | SNV | T  | G  | 12   | 1157 | 1,037165 | No | CDS:p.Val300Gly | Yes |
| BEG72_4 | 1163..1164 | MNV | CA | AT | 612  | 617  | 99,18963 | No | CDS:p.His316Ile | Yes |
